# Supplementary material
Source: PubMed Central journal article supplement (PMC3723403)

# Problem Behavior and Urban, Low-Income Youth

## A Randomized Controlled Trial of Positive Action in Chicago

Kendra M. Lewis, PhD, Marc B. Schure, MS, Niloofar Bavarian, PhD, David L. DuBois, PhD,  
Joseph Day, PhD, Peter Ji, PhD, Naida Silverthorn, PhD, Alan Acock, PhD,  
Samuel Vuchinich, PhD, Brian R. Flay, DPhil

### Appendix A

#### Flow diagram of students

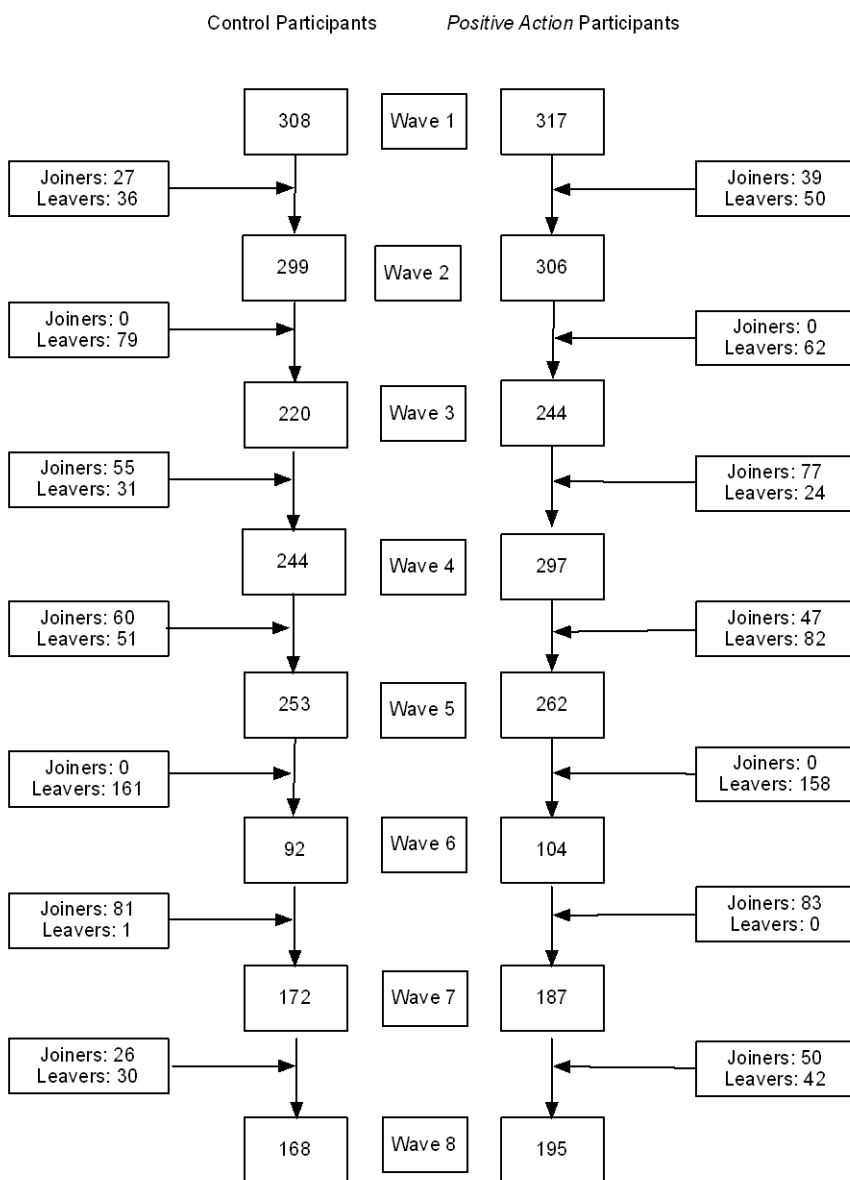

Supplement: NIHMS481102-supplement-01.pdf [file NIHMS481102-supplement-01.pdf]
